# Supplementary material for: Association of Undifferentiated Dyspnea in Late Life With Cardiovascular and Noncardiovascular Dysfunction: A Cross-sectional Analysis From the ARIC Study
Source: PubMed Central journal article supplement (PMC6575149; doi:10.1001/jamanetworkopen.2019.5321), 2019-06-14
Supplement: jamanetwopen-2-e195321-s001.pdf [file jamanetwopen-2-e195321-s001.pdf]

## Supplementary Online Content

Ramalho SHR, Santos M, Claggett B, et al. Association of undifferentiated dyspnea in late life with cardiovascular and noncardiovascular dysfunction: a cross-sectional analysis from the ARIC study. *JAMA Netw Open*. 2019;2(6):e195321.  
doi:10.1001/jamanetworkopen.2019.5321

**eFigure 1.** Prevalence of Dyspnea Among Atherosclerosis Risk in Communities (ARIC) Study Participants at the Fifth Study Visit

**eFigure 2.** Histogram of the Number of Abnormal Metrics of Cardiac and Noncardiac Organ Function Among Participants With No Dyspnea vs Moderate to Severe Dyspnea

**eFigure 3.** Adjusted Associations of Cardiovascular and Noncardiovascular Organ Dysfunction With Moderate to Severe Compared With No Dyspnea

**eAppendix.** Methods for Inverse–Probability-of-Attrition Weighting Analysis

**eTable 1.** Clinical Characteristics by Dyspnea Severity Using Inverse–Probability-of-Attrition Weighting

**eTable 2.** Measures of Cardiovascular Function by Dyspnea Severity Using Inverse–Probability-of-Attrition Weighting

**eTable 3.** Measures of Noncardiovascular Function by Dyspnea Severity Using Inverse–Probability-of-Attrition Weighting

**eTable 4.** Prevalence of Cardiovascular and Noncardiovascular Dysfunction by Dyspnea Severity Using Inverse–Probability-of-Attrition Weighting

**eTable 5.** Clinical Characteristics and Metrics of Cardiovascular and Noncardiovascular Function by Severity of Reported Dyspnea Adjusted for Age, Sex, Race, Household Income, Study Center, and Leisure-Time Physical Activity

**eTable 6.** Associations of Cardiovascular and Noncardiovascular Organ Dysfunctions With Moderate to Severe Compared With No to Mild Dyspnea Adjusted for Socioeconomic Characteristics

This supplementary material has been provided by the authors to give readers additional information about their work.

**eFigure 1.** Prevalence of Dyspnea Among Atherosclerosis Risk in Communities (ARIC) Study Participants at the Fifth Study Visit

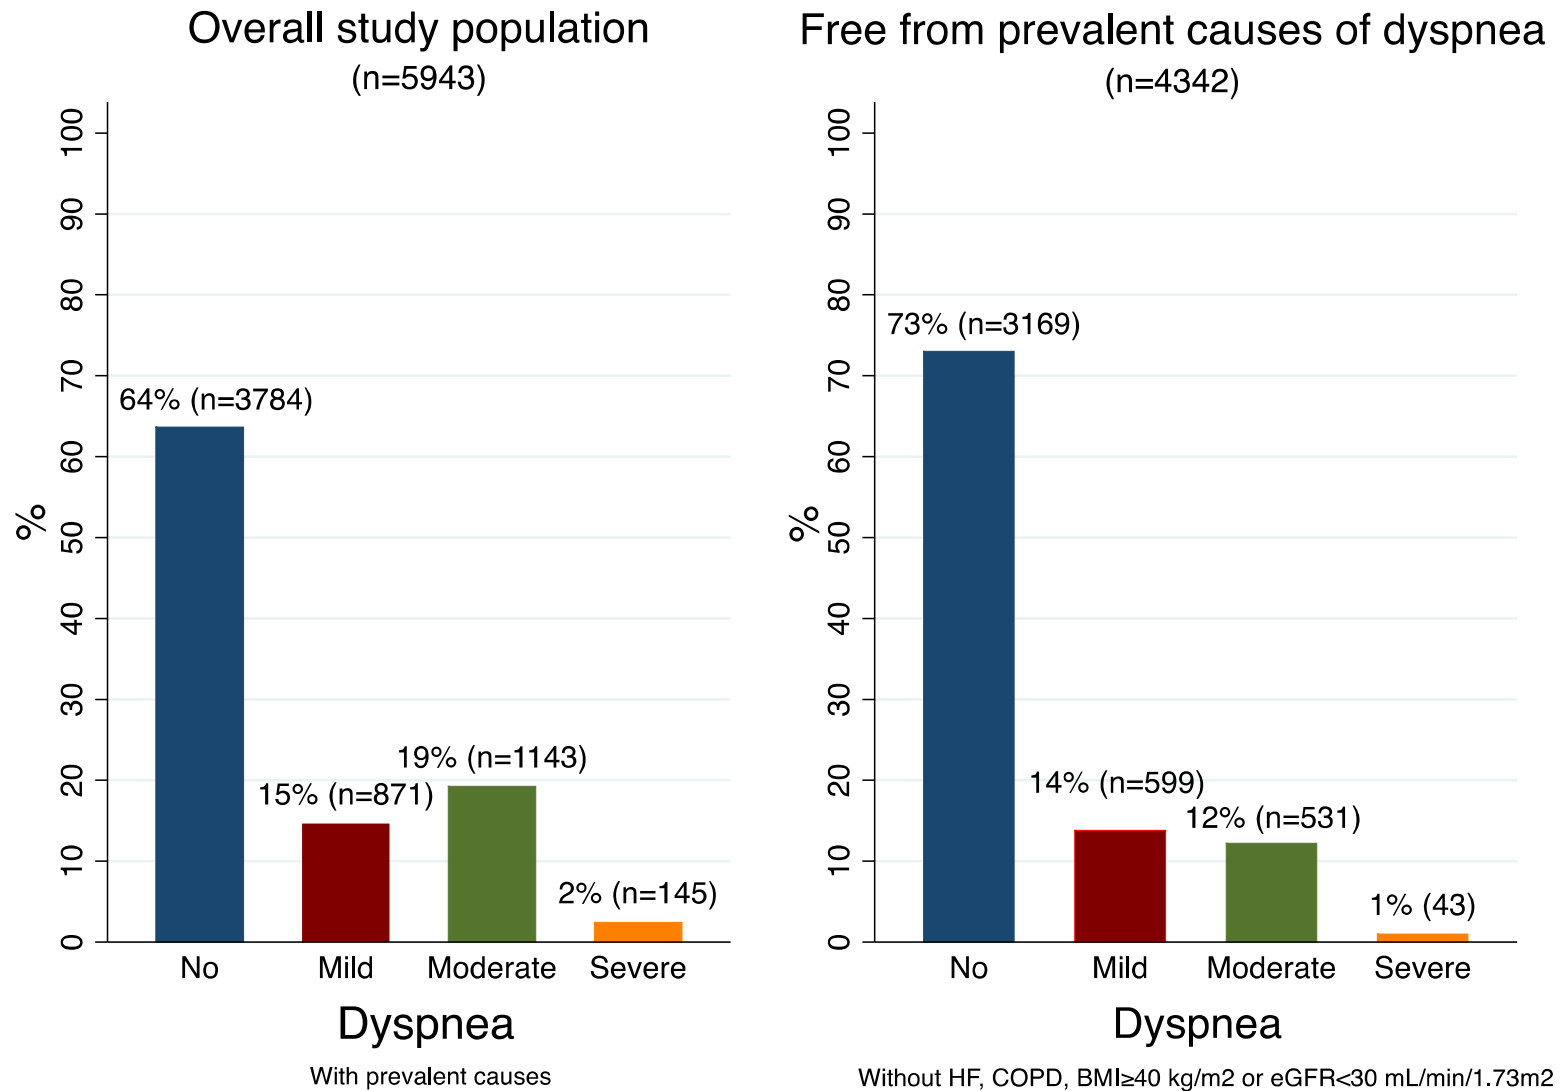

Legend: HF: heart failure; COPD: chronic pulmonary obstructive disease; BMI: body mass index; eGFR: estimated glomerular filtration rate. No dyspnea: mMRC=0, Mild: mMRC=1; Moderate: mMRC=2 and 3; Severe: mMRC=4

**eFigure 2.** Histogram of the Number Of Abnormal Metrics of Cardiac And Noncardiac Organ Function Among Participants With No Dyspnea Versus Moderate to Severe Dyspnea

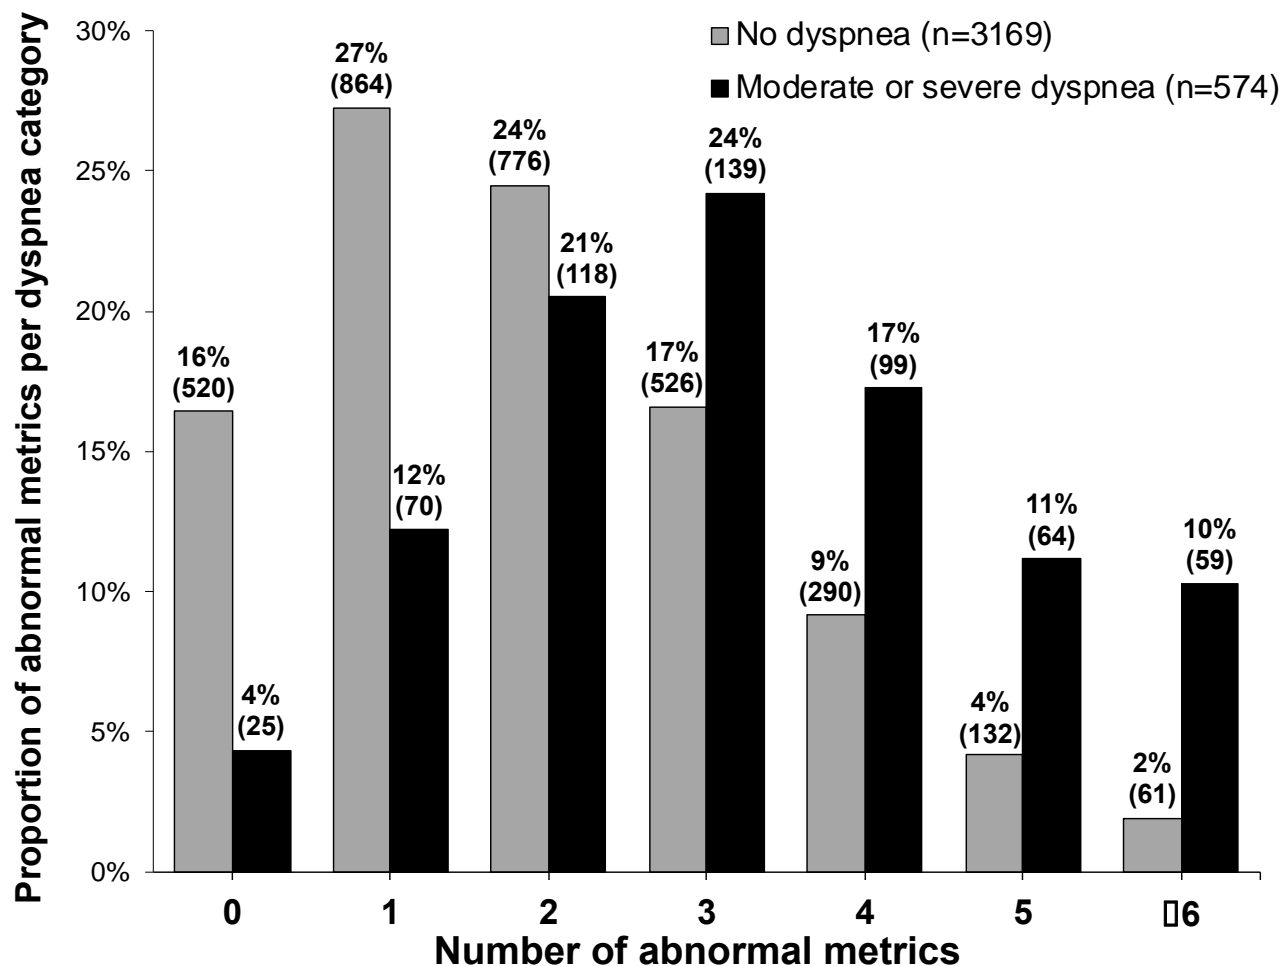

Caption: Participants with moderate/severe dyspnea had significantly more simultaneous dysfunctions (median [25-75<sup>th</sup> percentile] = 3[2-4]) than those with no/mild dyspnea (2[1-3]; p<0.001 adjusted for age, gender and race). Mild dyspnea suppressed for sensitivity analysis. Participants free of heart failure, chronic obstructive pulmonary disease, body mass index  $\geq 40$  kg/m<sup>2</sup>, or estimated glomerular filtration rate <30mL/min/1.73m<sup>2</sup>.

**eFigure 3.** Adjusted Associations of Cardiovascular and Noncardiovascular Organ Dysfunction With Moderate to Severe Compared With No Dyspnea

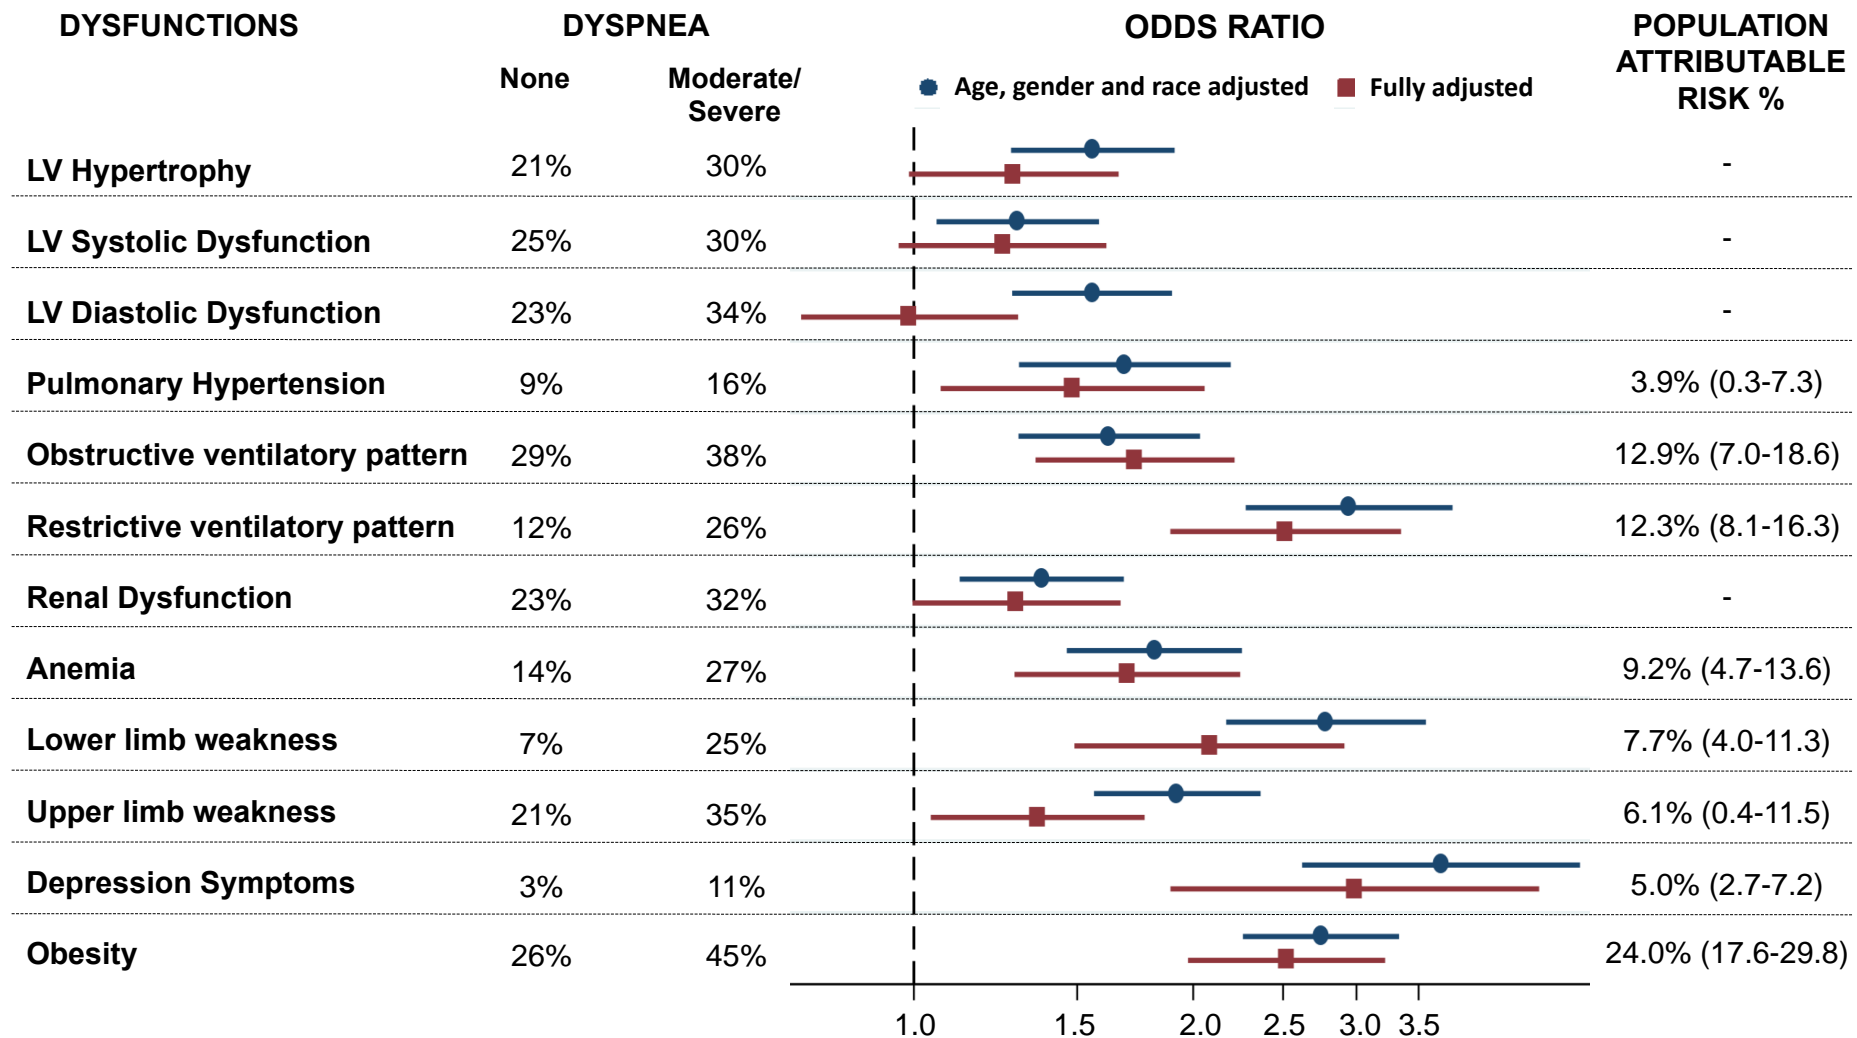

**Caption:** Percentage values in columns 2 and 3 represent the prevalence (%) of cardiovascular and non-cardiovascular dysfunctions in each dyspnea severity group. “Fully adjusted model”: adjusted for age, sex, race and all listed metrics of organ dysfunction. Population attributable risk is shown as a percent with 95% confidence intervals. Mild dyspnea suppressed for sensitivity analysis. Participants free of heart failure, chronic obstructive pulmonary disease, body mass index  $\geq 40$  kg/m<sup>2</sup>, or estimated glomerular filtration rate  $< 30$  mL/min/1.73m<sup>2</sup>.

## **eAppendix.** Methods for Inverse-Probability-of-Attrition Weighting Analysis

To examine the impact of inclusion bias due to potentially non-random Visit 5 non-attendance on the studied associations, we applied inverse-probability-of-attrition weighting (IPAW). Visit 5 nonattendance was modeled among participants alive at the initiation of visit 5, without previously diagnosed HF, COPD,  $\text{BMI} \geq 40 \text{ kg/m}^2$  and  $\text{eGFR} < 30 \text{ mL/min/1.73m}^2$ , using the following covariates from Visit 1: age, gender, race, hypertension, diabetes, smoking status, systolic blood pressure, heart rate, body mass index and eGFR. The resulting calculated weights were incorporated into multivariable models for the association of moderate or severe dyspnea with cardiovascular and non-cardiovascular organ function. Following Tables S2 to S5 show IPAW analysis.

**eTable 1.** Clinical Characteristics by Dyspnea Severity Using Inverse-Probability-of-Attrition Weighting

| Clinical Characteristics  | Overall    | No/mild    | Moderate or severe | p <sup>a</sup> |
|---------------------------|------------|------------|--------------------|----------------|
| Age (years), median [IQR] | 76.6 [4.8] | 75.9 [8.2] | 77.9 [9.5]         | <0.001         |
| Female                    | 60.1%      | 56.9%      | 62.4%              | 0.002          |
| Black                     | 25.1%      | 21.0%      | 33.6%              | <0.001         |
| Hypertension              | 84.3%      | 82.0%      | 91.2%              | <0.001         |
| Diabetes                  | 37.0%      | 33.7%      | 49.4%              | <0.001         |
| Coronary heart disease    | 13.5%      | 12.3%      | 18.0%              | <0.001         |
| Stroke                    | 3.6%       | 2.9%       | 5.1%               | 0.046          |
| Current smoker            | 6.1%       | 5.5%       | 8.4%               | 0.001          |
| Former smoker             | 52.1%      | 51.6%      | 53.1%              | 0.160          |

<sup>a</sup>p values for the comparison between dyspnea groups, adjusted for age, race and gender. Participants free of heart failure, chronic obstructive pulmonary disease, body mass index  $\geq 40$  kg/m<sup>2</sup>, or estimated glomerular filtration rate less than 30mL/min/1.73m<sup>2</sup>.

**eTable 2.** Measures of Cardiovascular Function By Dyspnea Severity Using Inverse-Probability-of-Attrition Weighting

| Function metrics                                 | Overall     | No/mild     | Moderate or severe | p <sup>a</sup> |
|--------------------------------------------------|-------------|-------------|--------------------|----------------|
|                                                  | median[IQR] | median[IQR] | median[IQR]        |                |
| <b>CARDIAC</b>                                   |             |             |                    |                |
| <b>Structure</b>                                 |             |             |                    |                |
| LVMi (g/m <sup>2</sup> )                         | 76 [23]     | 75 [23]     | 80 [26]            | <0.001         |
| LVEDV index (mL/m <sup>2</sup> )                 | 42.2 [13.1] | 42.4 [13.1] | 41.5 [13.0]        | 0.928          |
| MWT (cm)                                         | 0.96 [0.17] | 0.95 [0.17] | 1.00 [0.18]        | <0.001         |
| RWT (cm)                                         | 0.42 [0.08] | 0.42 [0.08] | 0.39[0.04]         | <0.001         |
| <b>LV Systolic Function</b>                      |             |             |                    |                |
| LVEF (%)                                         | 65.8 [7.3]  | 65.8 [7.2]  | 65.6 [8.0]         | 0.060          |
| LS (%)                                           | -18.1[3.2]  | -18.2 [3.2] | -17.7 [3.6]        | <0.001         |
| CS (%)                                           | -28.3 [4.9] | -28.3 [4.7] | -28.0 [5.4]        | 0.003          |
| <b>LV Diastolic Function</b>                     |             |             |                    |                |
| LAd (cm)                                         | 3.52 [0.71] | 3.49 [0.68] | 3.59 [0.75]        | <0.001         |
| LAVi (mL/m <sup>2</sup> )                        | 24.9 [9.8]  | 24.7 [9.6]  | 25.4 [10.6]        | 0.006          |
| Lateral e' (cm/s)                                | 6.7 [2.6]   | 6.8 [2.6]   | 6.4 [2.8]          | 0.036          |
| Septal e' (cm/s)                                 | 5.4 [1.8]   | 5.5 [1.8]   | 5.2 [1.8]          | 0.004          |
| E/e' lateral                                     | 9.6 [4.6]   | 9.4 [4.4]   | 10.3 [5.2]         | <0.001         |
| E/e' septal                                      | 11.7 [4.9]  | 11.5 [4.5]  | 12.7 [5.8]         | <0.001         |
| <b>Right Ventricle and Pulmonary Hemodynamic</b> |             |             |                    |                |
| RVFAC                                            | 0.53 [0.11] | 0.53 [0.11] | 0.52 [0.12]        | 0.004          |
| TAPSMV (cm/s)                                    | 11.4 [3.6]  | 11.4 [3.5]  | 11.2 [3.8]         | 0.569          |
| Est PASP (mmHg)                                  | 27 [7]      | 27 [7]      | 29 [9]             | <0.001         |
| <b>SYSTEMIC ARTERIAL</b>                         |             |             |                    |                |
| MAP (mmHg)                                       | 87 [15]     | 87 [15]     | 88 [15]            | 0.127          |
| PP (mmHg)                                        | 63 [19]     | 62 [19]     | 65 [19]            | 0.451          |
| cfPWV (cm/s)                                     | 1142 [399]  | 1131 [383]  | 1209 [366]         | 0.092          |

Legend: LV: left ventricle; LVMi: LV mass index; LVEDV: LV end-diastolic volume; MWT: LV mean wall thickness; RWT: Relative wall thickness; LVEF: LV ejection fraction; LS: longitudinal strain; CS: circumferential strain; LAd: left atrium maximal anteroposterior diameter; LAVi: left atrial volume index; Lateral e': Lateral early diastolic myocardial velocity; Septal e': Septal early diastolic myocardial velocity; E/e': early mitral inflow velocity / early diastolic velocity; RVFAC: right ventricle fractional area change; TAPSMV: Tricuspid annular peak systolic myocardial velocity; Est PASP: estimated pulmonary artery systolic pressure; MAP: mean arterial pressure; PP pulse pressure; cfPWV: carotid-femoral pulse wave velocity.

<sup>a</sup>p values for the comparison between dyspnea groups, adjusted for age, race and gender. Participants free of heart failure, chronic obstructive pulmonary disease, body mass index  $\geq 40$  kg/m<sup>2</sup>, or estimated glomerular filtration rate less than 30mL/min/1.73m<sup>2</sup>.

**eTable 3.** Measures of Noncardiovascular Function by Dyspnea Severity Using Inverse-Probability-of-Attrition Weighting

| Function metrics                     | Overall      | No/mild      | Moderate or severe | p <sup>a</sup> |
|--------------------------------------|--------------|--------------|--------------------|----------------|
|                                      | median [IQR] | median [IQR] | median [IQR]       |                |
| <b>PULMONARY</b>                     |              |              |                    |                |
| %predFEV1                            | 95.0 [27.1]  | 96.5 [24.8]  | 86.3 [30.0]        | <0.001         |
| %pred FVC                            | 96.4 [23.8]  | 97.5 [22.8]  | 90.2 [36.0]        | <0.001         |
| FEV1/FVC (%)                         | 73.2 [10.3]  | 73.5 [9.8]   | 72.1 [12.8]        | <0.001         |
| <b>RENAL</b>                         |              |              |                    |                |
| eGFR<br>(mL/min/1.73m <sup>2</sup> ) | 70.3 [24.6]  | 71.3 [23.5]  | 67.1 [28.3]        | 0.003          |
| <b>HEMATOLOGIC</b>                   |              |              |                    |                |
| Hemoglobin(g/dL)                     | 13.3 [1.8]   | 13.4 [1.8]   | 12.0 [1.1]         | 0.003          |
| <b>PHYSICAL FUNCTION</b>             |              |              |                    |                |
| SPPB score                           | 10 [3]       | 10 [2]       | 8 [4]              | <0.001         |
| Grip strength (kg)                   | 28 [14]      | 28 [14]      | 26 [12]            | <0.001         |
| <b>DEPRESSION</b>                    |              |              |                    |                |
| CES-D 11 items                       | 2 [3]        | 2 [3]        | 4 [4]              | <0.001         |
| <b>BODY MASS</b>                     |              |              |                    |                |
| BMI (kg/m <sup>2</sup> )             | 27.7 [6.3]   | 27.3 [5.9]   | 29.5 [7.8]         | <0.001         |

Legend: % pred: percent predicted; FEV1: forced expiratory volume in 1 second; FVC: forced vital capacity; eGFR: estimated glomerular filtration rate, using CKD-EPI equation; SPPB: Short Physical Performance Battery; CES-D 11-items: Center for Epidemiologic Studies Depression Scale – 11 items; BMI: body mass index.

<sup>a</sup>p values for the comparison between dyspnea groups, adjusted for age, race and gender. Participants free of heart failure, chronic obstructive pulmonary disease, body mass index  $\geq 40$  kg/m<sup>2</sup>, or estimated glomerular filtration rate less than 30mL/min/1.73m<sup>2</sup>.



**eTable 4.** Prevalence of Cardiovascular And Noncardiovascular Dysfunction By Dyspnea Severity Using Inverse-Probability-of-Attrition Weighting

| Dysfunction              | Overall | No/mild | Moderate or severe | Model 1 p | Model 2 p |
|--------------------------|---------|---------|--------------------|-----------|-----------|
| LV Hypertrophy           | 26.0%   | 23.7%   | 34.4%              | <0.001    | 0.046     |
| LV Systolic dysfunction  | 29.1%   | 27.1%   | 37.6%              | <0.001    | 0.010     |
| LV Diastolic Dysfunction | 29.4%   | 26.0%   | 35.8%              | <0.001    | 0.917     |
| Pulmonary Hypertension   | 12.8%   | 10.1%   | 18.1%              | <0.001    | 0.003     |
| Obstructive pattern      | 38.6%   | 35.9%   | 50.7%              | <0.001    | <0.001    |
| Restrictive pattern      | 17.7%   | 14.7%   | 30.8%              | <0.001    | <0.001    |
| Renal dysfunction        | 29.2%   | 26.5%   | 35.4%              | <0.001    | 0.060     |
| Anemia                   | 12.9%   | 17.7%   | 30.1%              | <0.001    | 0.010     |
| Lower Limb weakness      | 8.1%    | 10.2%   | 29.1%              | <0.001    | <0.001    |
| Upper Limb weakness      | 18.9%   | 17.7%   | 23.7%              | 0.001     | 0.696     |
| Depression               | 5.8%    | 3.8%    | 13.7%              | <0.001    | <0.001    |
| Obesity                  | 31.4%   | 28.0%   | 46.2%              | <0.001    | <0.001    |

Legend: LV: left ventricle; LV Hypertrophy: LV mass index (LVMI) >96.1g/m<sup>2</sup> men and >83g/m<sup>2</sup> women. Systolic dysfunction: defined as any of: LVEF<60% men and <59% women, or longitudinal strain <-16% both genders, or circumferential strain <23% for both genders. Diastolic dysfunction: defined as at least two of: left atrial (LA) anteroposterior diameter (LAD) >4.0cm men and >3.7cm women, or LA volume index (LAVi) >31mL/m<sup>2</sup> men and >30mL/m<sup>2</sup> women, or Lateral tissue Doppler imaging (TDI) relaxation velocity (e') <5.4cm/s men and <5.1cm/s women, or septal TDI e' <4.6cm/s men and <4.5cm/s women, or lateral E/e' >11.5 men and >13.3 women; or septal E/e' >13.3 men and >15.1 women. Pulmonary hypertension: pulmonary artery systolic pressure >32mmHg. Obstructive ventilatory pattern: FEV1/FVC<70%; Restrictive pattern: percent predicted forced vital capacity <80%; Renal Dysfunction: estimated glomerular filtration rate <60mL/min/1.73m<sup>2</sup>; Anemia: hemoglobin <13g/dL men and <12g/dL women; Lower limbs physical dysfunction: short physical performance battery score≤6; Upper limb physical dysfunction: grip strength <20<sup>th</sup> percentile for gender and body mass index (BMI) predicted; Depression: CES-D 11items score ≥9 points; Obesity: BMI≥30kg/m<sup>2</sup>.

Model1: model adjustment included age, gender and race.

Model 2: model adjustment included age, gender, race, left ventricle hypertrophy, LV Systolic dysfunction, LV Diastolic dysfunction, pulmonary artery hypertension, obstructive ventilatory pattern, restrictive ventilator pattern, renal dysfunction, anemia, lower limbs physical dysfunction, upper limb physical dysfunction, depression and obesity.

**eTable 5.** Clinical Characteristics and Metrics of Cardiovascular and Noncardiovascular Function by Severity of Reported Dyspnea, Adjusted for Age, Sex, Race, Household Income, Study Center, And Leisure-Time Physical Activity

| Clinical characteristics                                             | No dyspnea<br>(mMRC=0)<br>n=3169 (73%) | Mild dyspnea<br>(mMRC=1)<br>n=599 (14%) | Moderate or<br>severe dyspnea<br>(mMRC≥2)<br>n=574 (13%) | p-trend <sup>a</sup> |
|----------------------------------------------------------------------|----------------------------------------|-----------------------------------------|----------------------------------------------------------|----------------------|
| <b>DEMOGRAPHICS</b>                                                  |                                        |                                         |                                                          |                      |
| Age, years; mean±SD                                                  | 75.4 ± 4.9                             | 76.4 ± 5.0                              | 77.4 ± 5.3                                               | <0.001               |
| Female; n(%)                                                         | 1764 (56%)                             | 397 (66%)                               | 372 (65%)                                                | <0.001               |
| Black race; n(%)                                                     | 563 (18%)                              | 116 (19%)                               | 169 (29%)                                                | <0.001               |
| Study Center                                                         |                                        |                                         |                                                          | <0.001               |
| Forsyth County, NC                                                   | 761 (24%)                              | 134 (22%)                               | 84 (15%)                                                 |                      |
| Jackson, MS                                                          | 511 (16%)                              | 106 (18%)                               | 151 (26%)                                                |                      |
| Minneapolis, MN                                                      | 1038 (33%)                             | 182 (30%)                               | 175 (30%)                                                |                      |
| Washington County, MD                                                | 859 (27%)                              | 177 (30%)                               | 164 (29%)                                                |                      |
| Total family income <sup>b</sup>                                     |                                        |                                         |                                                          | <0.001               |
| <\$16.000                                                            | 301 (10%)                              | 81 (14%)                                | 118 (21%)                                                |                      |
| \$16.000-34.999                                                      | 709 (22%)                              | 172 (29%)                               | 178 (31%)                                                |                      |
| ≥\$35.000                                                            | 1904 (60%)                             | 296 (49%)                               | 229 (40%)                                                |                      |
| Leisure-time Physical activity <sup>c</sup>                          |                                        |                                         |                                                          | <0.001               |
| Ideal                                                                | 1881 (60%)                             | 243 (41%)                               | 175 (31%)                                                |                      |
| Intermediate                                                         | 550 (17%)                              | 115 (19%)                               | 149 (26%)                                                |                      |
| Poor                                                                 | 732 (23%)                              | 240 (40%)                               | 248 (43%)                                                |                      |
| <b>CV DISEASE AND RISK FACTORS</b>                                   |                                        |                                         |                                                          |                      |
| Hypertension; n(%)                                                   | 2459 (77%)                             | 517 (86%)                               | 510 (89%)                                                | <0.001               |
| Diabetes; n(%)                                                       | 957 (30%)                              | 224 (37%)                               | 253 (44%)                                                | <0.001               |
| Current smoker; n(%)                                                 | 149 (5 %)                              | 35 (6%)                                 | 38 (7%)                                                  | 0.023                |
| Former smoker; n(%)                                                  | 1473 (50%)                             | 281 (50%)                               | 261 (50%)                                                | 0.10                 |
| Coronary heart disease; n(%)                                         | 276 (9%)                               | 58 (10%)                                | 67 (12%)                                                 | 0.003                |
| Stroke; n(%)                                                         | 59 (2%)                                | 19 (3%)                                 | 26 (4%)                                                  | 0.004                |
| <b>MARKERS OF HF</b>                                                 |                                        |                                         |                                                          |                      |
| Lower extremity edema; n(%)                                          | 345 (11%)                              | 96 (16%)                                | 122 (22%)                                                | <0.001               |
| Diuretic use; n(%)                                                   | 87 (3%)                                | 38 (6%)                                 | 45 (8%)                                                  | <0.001               |
| NT-proBNP, pg/mL; median[25-75 <sup>th</sup> percentile]             | 108 [58-208]                           | 136 [71-256]                            | 160 [81-318]                                             | <0.001               |
| High sensit troponin-T, ng/L; median[25-75 <sup>th</sup> percentile] | 10.0 [7.0-14.0]                        | 10.0 [7.0-15.0]                         | 12.0 [9.0-18.0]                                          | <0.001               |
| <b>CARDIAC</b>                                                       |                                        |                                         |                                                          |                      |
| <b>Left Ventricle Structure</b>                                      |                                        |                                         |                                                          |                      |
| LV mass index (g/m <sup>2</sup> ); mean±SD                           | 77 ± 18                                | 79 ± 18                                 | 80 ± 20                                                  | <0.001               |
| LVEDV index (mL/m <sup>2</sup> ); mean±SD                            | 43.9 ± 10.2                            | 42.1 ± 9.3                              | 42.4 ± 9.3                                               | 0.15                 |
| Mean wall thickness (cm); mean±SD                                    | 0.97 ± 0.13                            | 0.99 ± 0.13                             | 1.01 ± 0.14                                              | <0.001               |
| Relative wall thickness (cm); mean±SD                                | 0.42 ± 0.07                            | 0.43 ± 0.08                             | 0.44 ± 0.09                                              | <0.001               |

| <b>Left ventricle Systolic Function</b>                             |             |             |             |        |
|---------------------------------------------------------------------|-------------|-------------|-------------|--------|
| LV ejection fraction (%); mean±SD                                   | 65.8 ± 5.8  | 65.8 ± 6.4  | 65.6 ± 6.4  | 0.44   |
| Longitudinal strain (%); mean±SD                                    | -18.2 ± 2.4 | -18.0 ± 2.5 | -17.8 ± 2.6 | 0.004  |
| Circumferential strain (%); mean±SD                                 | -28.0 ± 3.7 | -27.9 ± 4.1 | -27.5 ± 3.6 | 0.011  |
| <b>Left Ventricle Diastolic Function</b>                            |             |             |             |        |
| LA diameter (cm); mean±SD                                           | 3.49 ± 0.49 | 3.52 ± 0.45 | 3.56 ± 0.54 | <0.001 |
| LA volume index (mL/m <sup>2</sup> ); mean±SD                       | 25.1 ± 8.3  | 26.2 ± 7.8  | 26.4 ± 8.8  | <0.001 |
| Lateral e' (cm/s); mean±SD                                          | 7.2 ± 2.0   | 6.9 ± 1.8   | 6.8 ± 2.1   | 0.15   |
| Septal e' (cm/s); mean±SD                                           | 5.8 ± 1.5   | 5.5 ± 1.3   | 5.5 ± 1.6   | 0.004  |
| E/e' lateral; mean±SD                                               | 9.8 ± 3.6   | 10.3 ± 3.5  | 10.6 ± 4.0  | 0.001  |
| E/e' septal; mean±SD                                                | 11.8 ± 3.9  | 12.6 ± 3.8  | 13.0 ± 4.7  | <0.001 |
| <b>Right Ventricle (RV) function and pulmonary hemodynamics</b>     |             |             |             |        |
| RV fractional area change; mean±SD                                  | 0.52 ± 0.08 | 0.53 ± 0.8  | 0.52 ± 0.08 | 0.52   |
| Tricuspid annular peak systolic myocardial velocity (cm/s); mean±SD | 11.9 ± 2.8  | 11.7 ± 3.0  | 11.7 ± 3.0  | 0.42   |
| Estimated PASP (mmHg); mean±SD                                      | 27 ± 5      | 29 ± 7      | 29 ± 6      | <0.001 |
| <b>SYSTEMIC ARTERIAL</b>                                            |             |             |             |        |
| Systolic pressure (mmHg); mean±SD                                   | 130 ± 17    | 131 ± 19    | 131 ± 18    | 0.51   |
| Diastolic pressure (mmHg); mean±SD                                  | 67 ± 10     | 67 ± 11     | 66 ± 11     | 0.82   |
| Pulse pressure (mmHg); mean±SD                                      | 63 ± 14     | 64 ± 15     | 65 ± 14     | 0.57   |
| cfPWV (cm/s); mean±SD                                               | 1154 ± 337  | 1170 ± 293  | 1213 ± 348  | 0.71   |
| <b>PULMONARY</b>                                                    |             |             |             |        |
| % predicted FEV <sub>1</sub> ; mean±SD                              | 98.3 ± 18.5 | 91.9 ± 19.1 | 89.4 ± 22.4 | <0.001 |
| % predicted FVC; mean±SD                                            | 99 ± 19     | 94 ± 18     | 91 ± 22     | <0.001 |
| FEV <sub>1</sub> /FVC (%); mean±SD                                  | 73.2 ± 7.4  | 72.9 ± 8.4  | 71.3 ± 10.0 | <0.001 |
| <b>RENAL</b>                                                        |             |             |             |        |
| eGFR (mL/min/1.73m <sup>2</sup> ); mean±SD                          | 71.9 ± 15   | 69.8 ± 16   | 68.5 ± 17   | 0.002  |
| <b>HEMATOLOGIC</b>                                                  |             |             |             |        |
| Hemoglobin (g/dL); mean±SD                                          | 13.5 ± 1.3  | 13.3 ± 1.4  | 12.9 ± 1.5  | <0.001 |
| <b>PHYSICAL FUNCTION</b>                                            |             |             |             |        |
| SPPB score; mean±SD                                                 | 9.9 ± 2.1   | 9.4 ± 2.2   | 8.1 ± 2.8   | <0.001 |
| Grip strength (kg); mean±SD                                         | 30.2 ± 10.5 | 27.7 ± 9.7  | 26.9 ± 9.4  | <0.001 |
| <b>DEPRESSION SCORE</b>                                             |             |             |             |        |
| CES-D 11-items; mean±SD                                             | 2.4 ± 2.5   | 3.5 ± 2.9   | 4.1 ± 3.3   | <0.001 |
| <b>BODY MASS</b>                                                    |             |             |             |        |
| Body mass index (kg/m <sup>2</sup> ); mean±SD                       | 27.3 ± 4.3  | 29.2 ± 4.5  | 29.6 ± 4.9  | <0.001 |

Legend: CV: cardiovascular. Hypertension: use of antihypertensive medication or blood pressure  $\geq 140/90$  mmHg. Diabetes: fasting glycemia  $\geq 126$  mg/dL, nonfasting glycemia  $\geq 200$  mg/dL or use of anti-diabetic medication. LV: left ventricle; LVEDV: LV end-diastolic volume; LA: left atrium; Lateral e': Lateral early diastolic myocardial velocity; Septal e': Septal early diastolic myocardial velocity; E/e': early mitral inflow velocity/early diastolic velocity; PASP: pulmonary artery systolic pressure; cfPWV: carotid-femoral pulse wave velocity; FEV<sub>1</sub>: forced expiratory volume in 1 second; FVC: forced vital capacity; eGFR: estimated glomerular filtration rate, using CKD-

EPI equation; SPPB: Short Physical Performance Battery; CES-D 11-items: Center for Epidemiologic Studies Depression Scale – 11 items.

<sup>a</sup>Adjusted p values for age, race and gender to all variables, except for Age, Female, Black race, Study center, Income and Physical activity. Participants were free of diagnosed HF or COPD, BMI $\geq$ 40 kg/m<sup>2</sup>, or eGFR $<$ 30mL/min/1.73m<sup>2</sup>.

<sup>b</sup>8% missing

<sup>c</sup>Leisure-time physical activity: Ideal  $\geq$ 150 min/week of moderate activity,  $\geq$ 75 min/week of vigorous activity, or  $\geq$ 150 min/week of moderate + vigorous activity; Intermediate 1–149 min/week of moderate activity, 1–74 min/week of vigorous activity, or 1–149 min/week of moderate + vigorous activity; Poor 0 min/week of moderate + vigorous activity.

**eTable 6.** Associations of Cardiovascular and Noncardiovascular Organ Dysfunctions With Moderate to Severe Compared With No to Mild Dyspnea Adjusted For Socioeconomic Characteristics

| <b>Dysfunctions</b>      | <b>Model 1: adjusted for age, gender, race, study center, household income and physical activity<sup>a</sup></b> | <b>Model 2: adjusted as model 1 and all listed dysfunctions</b> |
|--------------------------|------------------------------------------------------------------------------------------------------------------|-----------------------------------------------------------------|
|                          | OR (95%CI)                                                                                                       | OR (95%CI)                                                      |
| LV Hypertrophy           | 1.40 (1.14-1.71)                                                                                                 | 1.22 (0.95-1.58)                                                |
| LV Systolic Dysfunction  | 1.21 (0.99-1.48)                                                                                                 | 1.20 (0.94-1.58)                                                |
| LV Diastolic Dysfunction | 1.45 (1.19-1.76)                                                                                                 | 0.99 (0.76-1.28)                                                |
| Pulmonary hypertension   | 1.51 (1.16-1.96)                                                                                                 | 1.45 (1.06-1.98)                                                |
| Obstructive pattern      | 1.65 (1.32-2.07)                                                                                                 | 1.72 (1.35-2.19)                                                |
| Restrictive pattern      | 2.43 (1.89-2.12)                                                                                                 | 2.06 (1.57-2.71)                                                |
| Renal Dysfunction        | 1.26 (1.03-1.54)                                                                                                 | 1.26 (0.98-1.61)                                                |
| Anemia                   | 1.64 (1.32-2.03)                                                                                                 | 1.55 (1.18-2.03)                                                |
| Lower limbs weakness     | 2.40 (1.88-3.07)                                                                                                 | 1.96 (1.42-2.69)                                                |
| Upper limbs weakness     | 1.71 (1.39-2.11)                                                                                                 | 1.26 (0.97-1.61)                                                |
| Depression symptoms      | 2.61 (1.88-3.63)                                                                                                 | 2.11 (1.38-3.23)                                                |
| Obesity                  | 2.04 (1.69-2.47)                                                                                                 | 2.02 (1.59-2.57)                                                |

<sup>a</sup>Study center: Forsyth County NC, Jackson MS, Minneapolis MN, Washington County MD. Household Income: Lower (<USD 16,000), Intermediate (USD 16,000-34,999), Higher (≥35,000); Leisure-time physical activity: Ideal ≥150 min/week of moderate activity, ≥75 min/week of vigorous activity, or ≥150 min/week of moderate + vigorous activity; Intermediate 1–149 min/week of moderate activity, 1–74 min/week of vigorous activity, or 1–149 min/week of moderate + vigorous activity; Poor 0 min/week of moderate + vigorous activity. Participants free of heart failure, chronic obstructive pulmonary disease, body mass index ≥40 kg/m<sup>2</sup>, or estimated glomerular filtration rate <30mL/min/1.73m<sup>2</sup>.
